# Supplementary material for: (1,6)Pyrenophanes containing crown ether moieties as fluorescence sensors for metal and ammonium ions. Formation of sandwich, dumbbell, and pseudorotaxane complexes
Source: Royal Society of Chemistry journal article supplement (doi:10.1039/d2nj04790j), 2022-12-09
Supplement: d2nj04790j1.pdf [file d2nj04790j1.pdf]

Supporting Information for

**(1,6)Pyrenophanes containing crown ether moieties as fluorescence sensors for metal and ammonium ions. Formation of sandwich, dumbbell, and pseudorotaxane complexes**

Hajime Maeda,\* Genki Saito, Taniyuki Furuyama and Masahito Segi

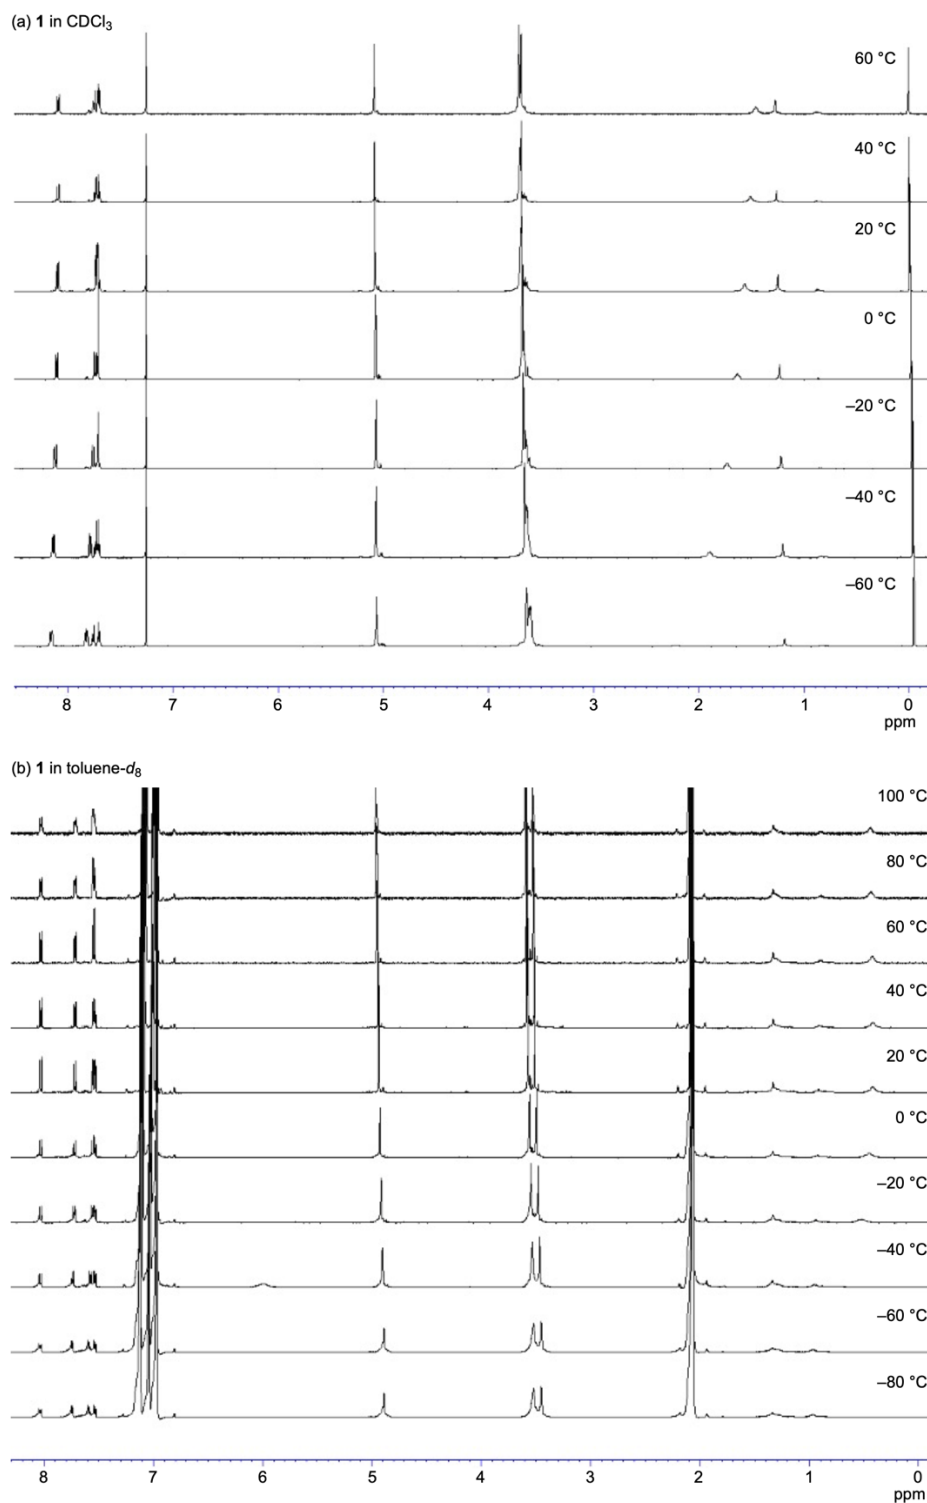

**Fig. S1** Variable-temperature 500 MHz <sup>1</sup>H NMR spectra of **1** in (a) CDCl<sub>3</sub> and (b) toluene-*d*<sub>8</sub>.

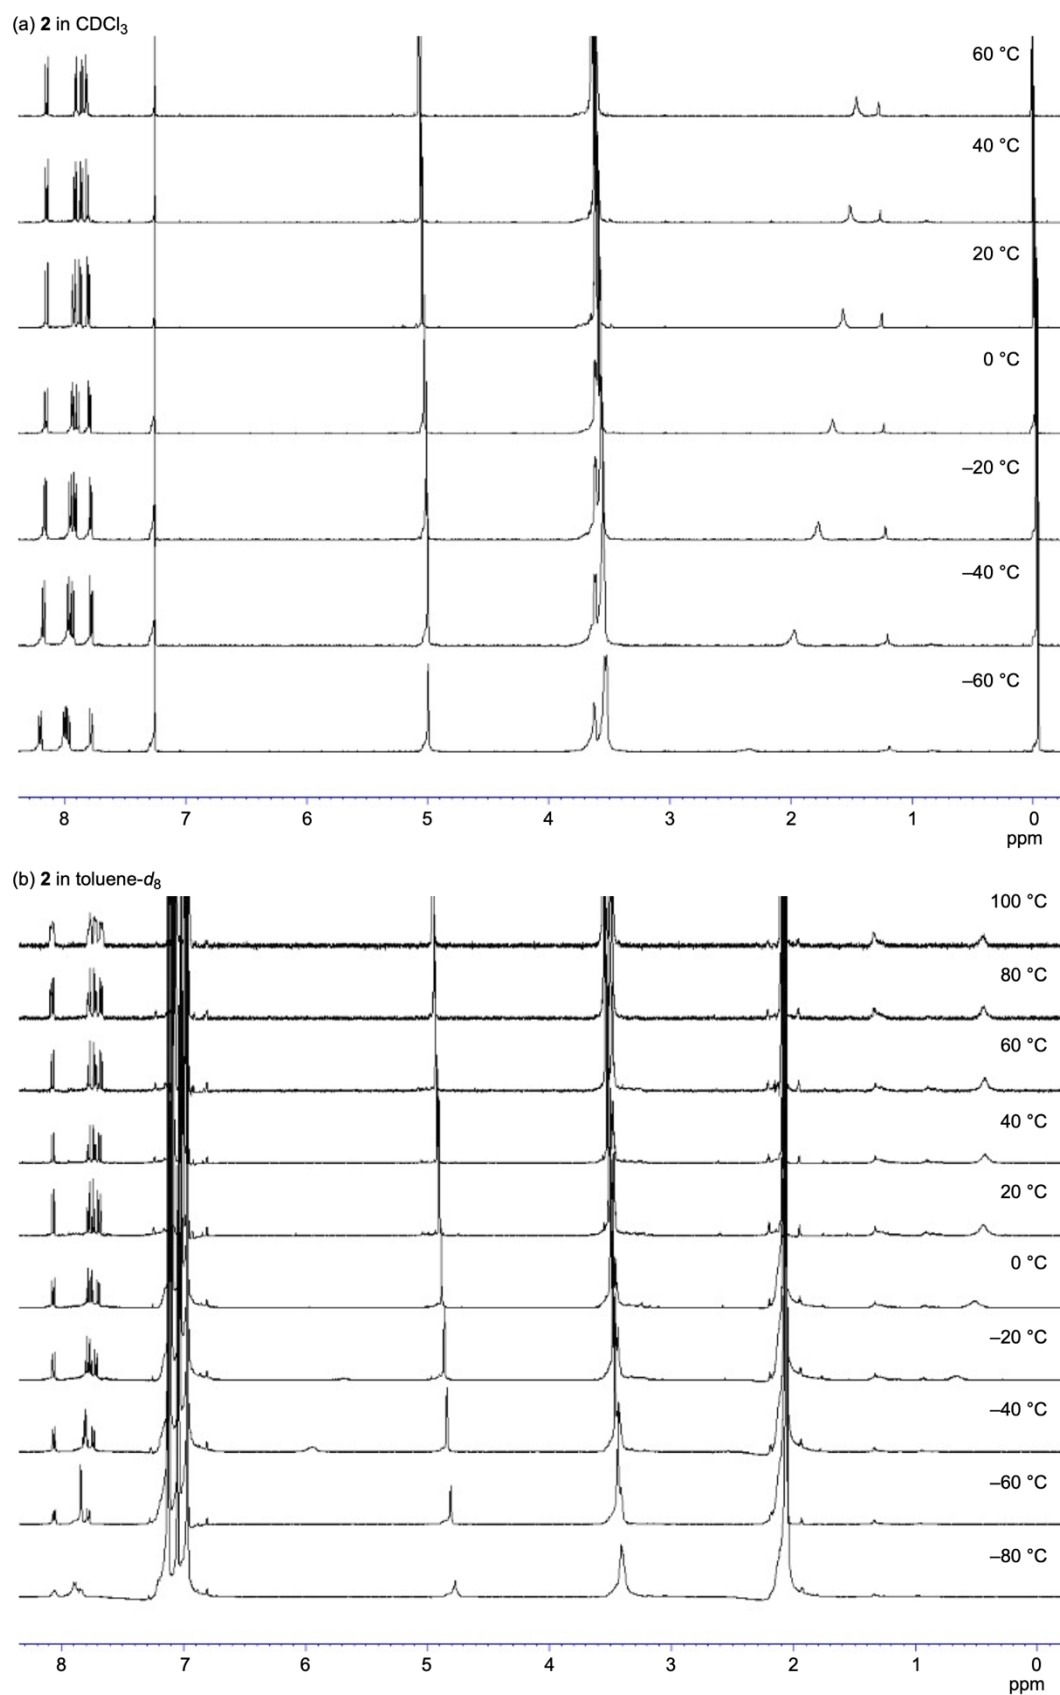

**Fig. S2** Variable-temperature 500 MHz <sup>1</sup>H NMR spectra of **2** in (a) CDCl<sub>3</sub> and (b) toluene-*d*<sub>8</sub>.

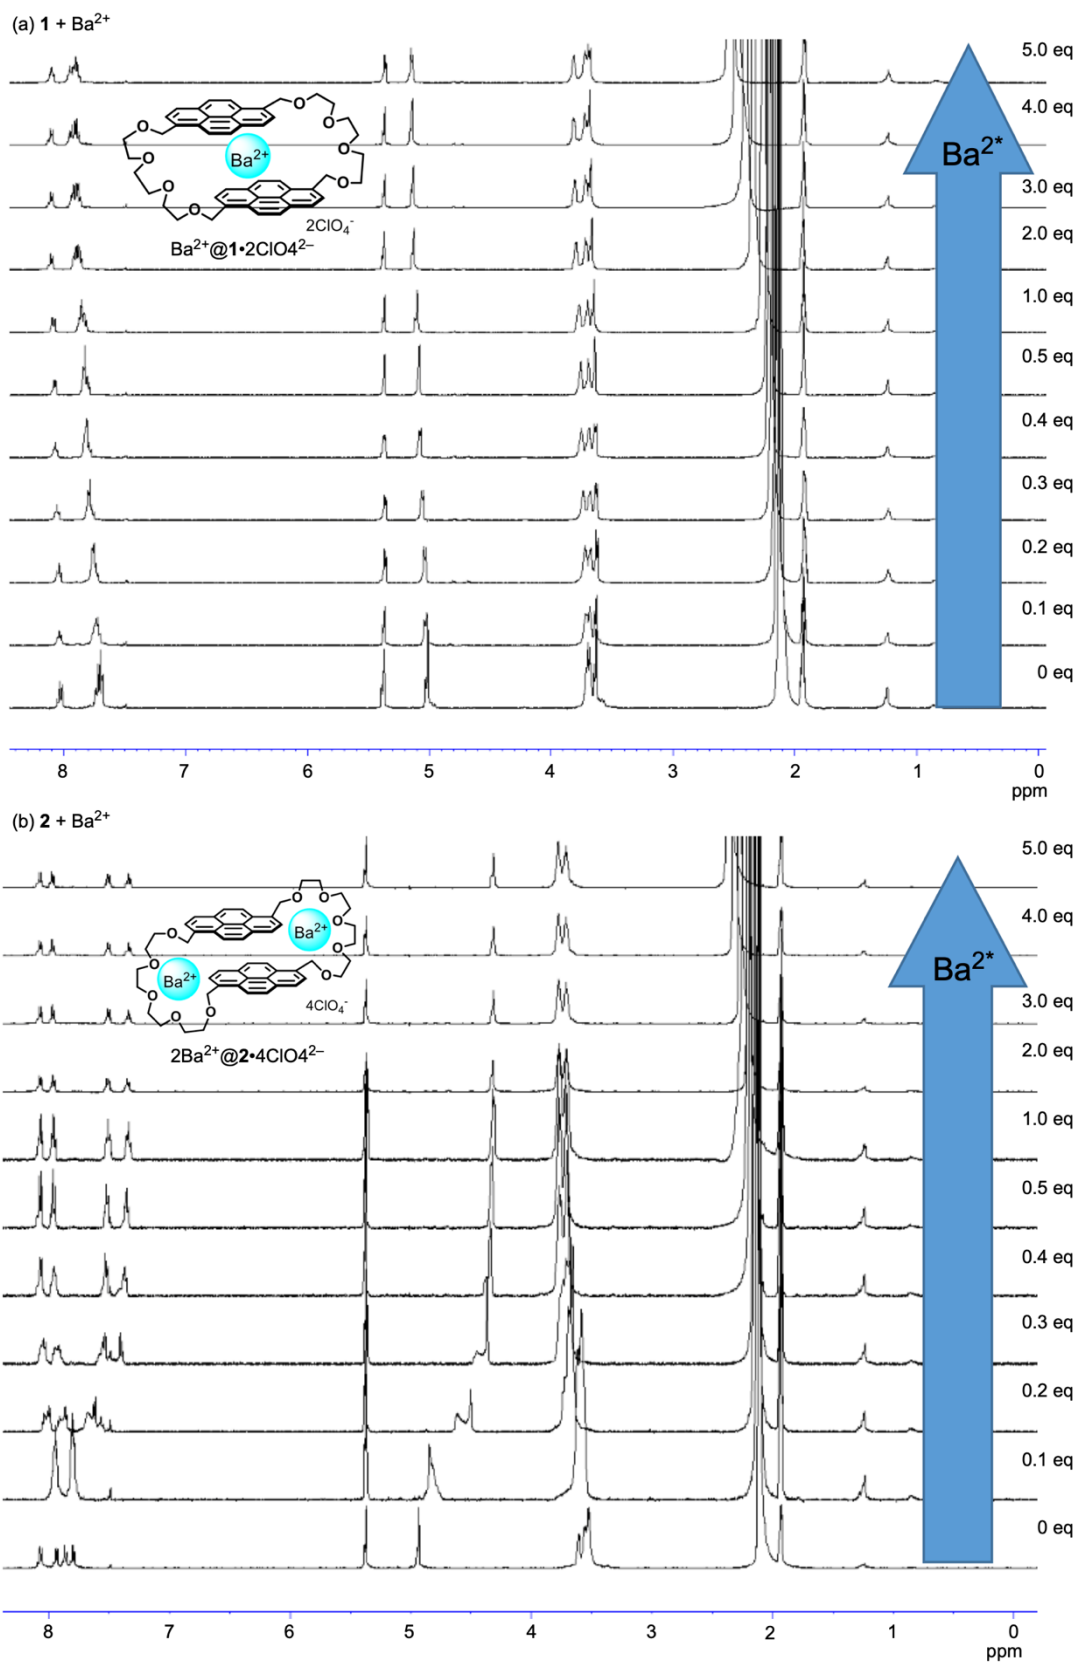

**Fig. S3** 500 MHz <sup>1</sup>H NMR spectra of (a) **1** and (b) **2** upon addition of Ba(ClO<sub>4</sub>)<sub>2</sub>.

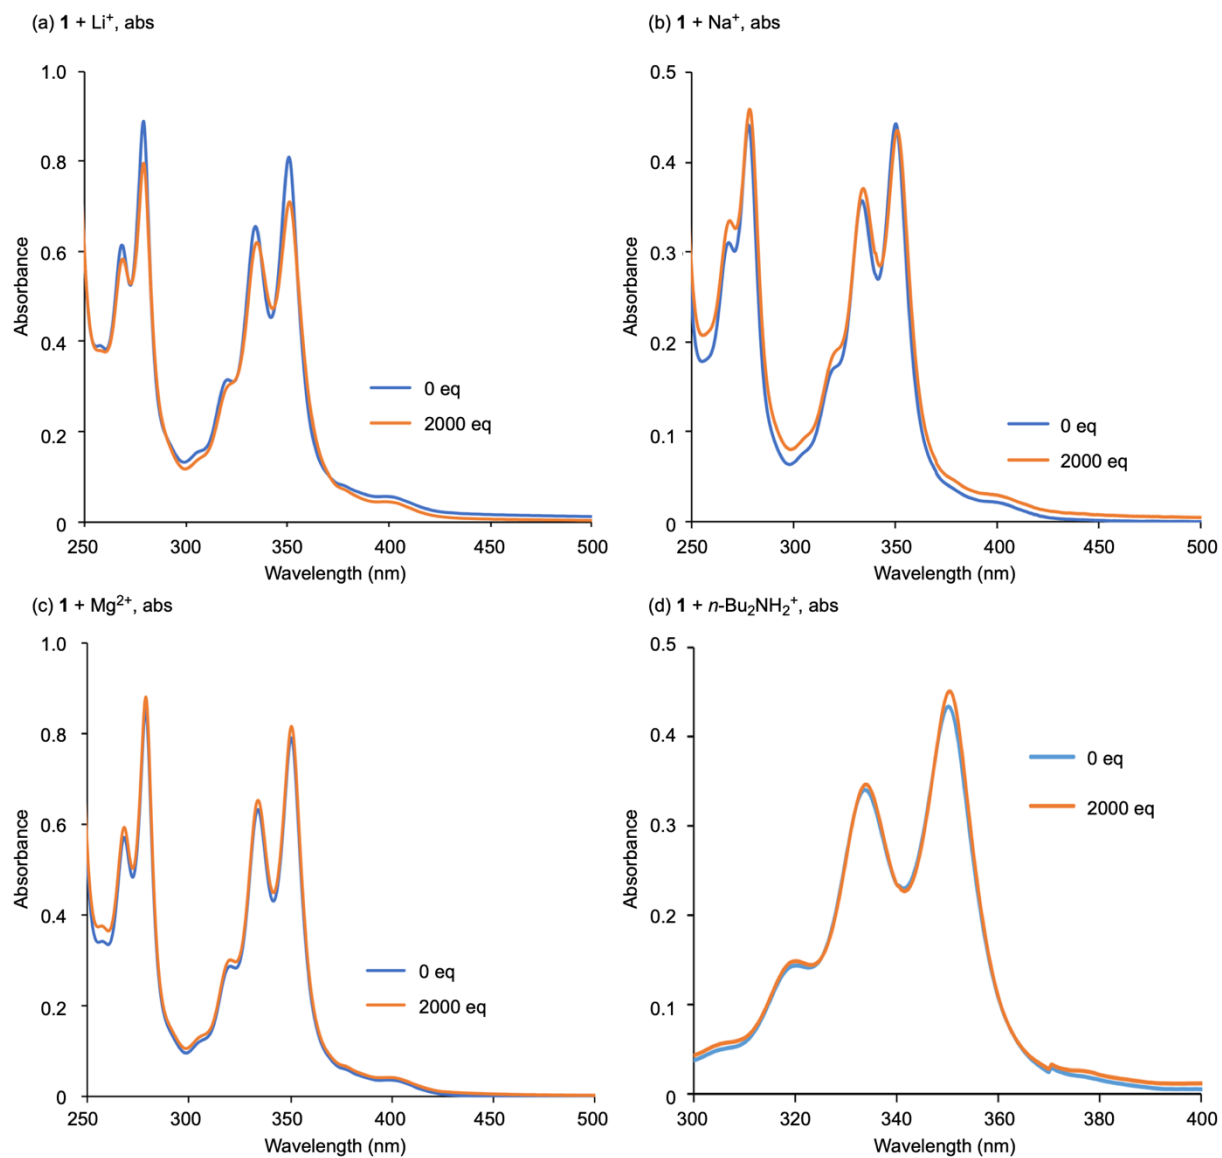

**Fig. S4** Absorption spectra of **1** ( $1.0 \times 10^{-5}$  M in  $\text{CH}_2\text{Cl}_2 : \text{CH}_3\text{CN} = 1 : 1$ ) upon addition of (a)  $\text{LiClO}_4$  (0-2000 equiv), (b)  $\text{NaClO}_4$  (0-2000 equiv), (c)  $\text{Mg}(\text{ClO}_4)_2$  (0-2000 equiv), and (d)  $n\text{-Bu}_2\text{NH}_2^+\text{PF}_6^-$  (0-2000 equiv).

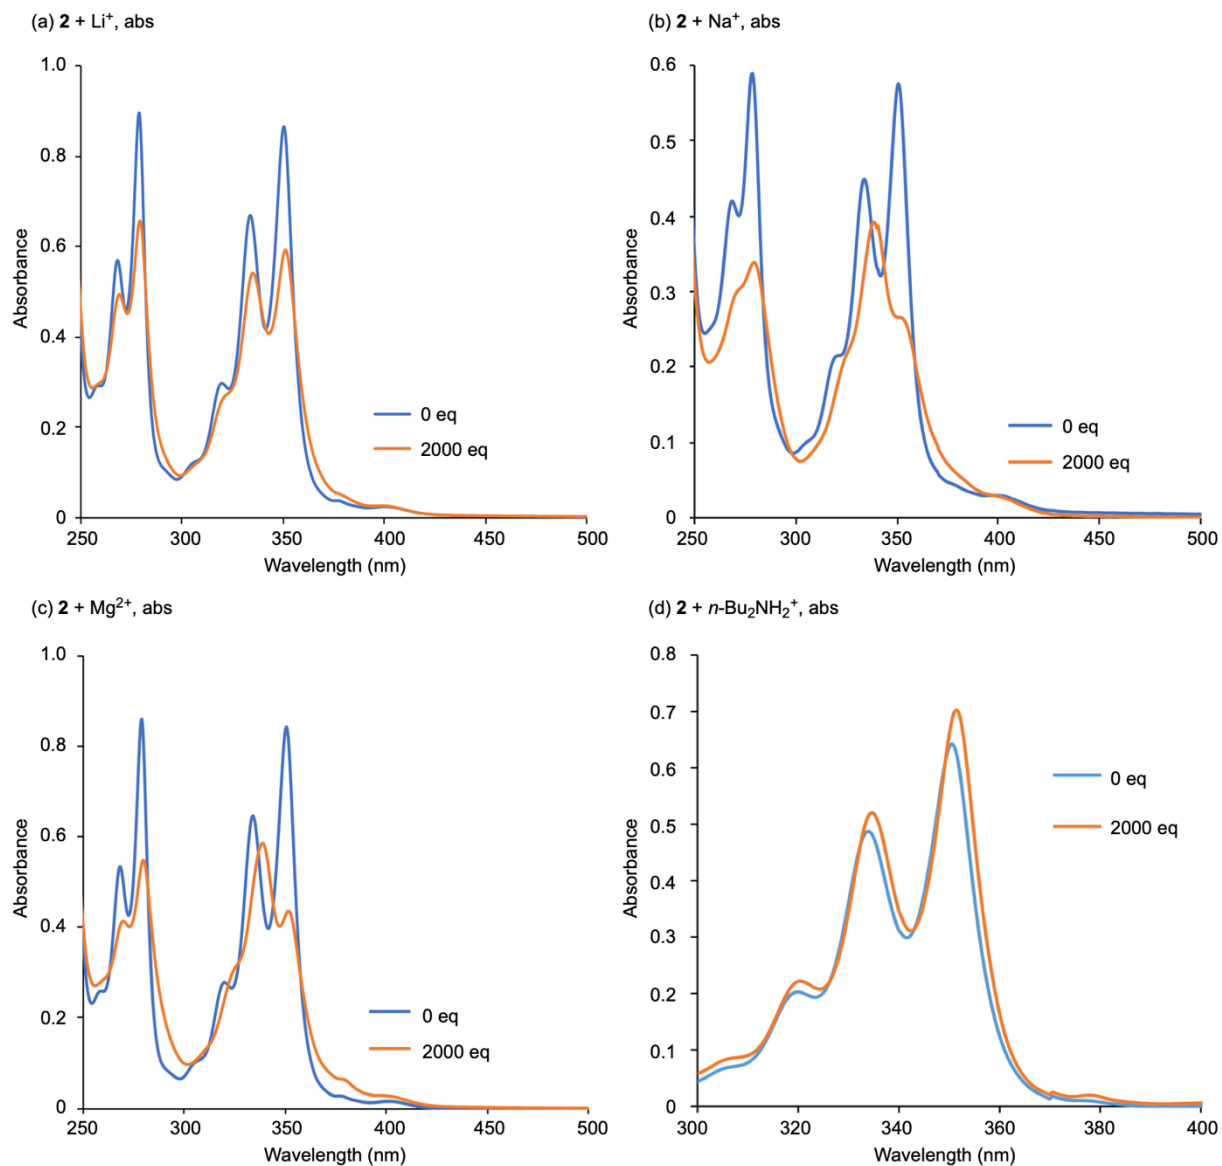

**Fig. S5** Absorption spectra of **2** ( $1.0 \times 10^{-5}$  M in  $\text{CH}_2\text{Cl}_2 : \text{CH}_3\text{CN} = 1 : 1$ ) upon addition of (a)  $\text{LiClO}_4$  (0-2000 equiv), (b)  $\text{NaClO}_4$  (0-2000 equiv), (c)  $\text{Mg}(\text{ClO}_4)_2$  (0-2000 equiv), and (d)  $n\text{-Bu}_2\text{NH}_2+\text{PF}_6^-$  (0-2000 equiv).

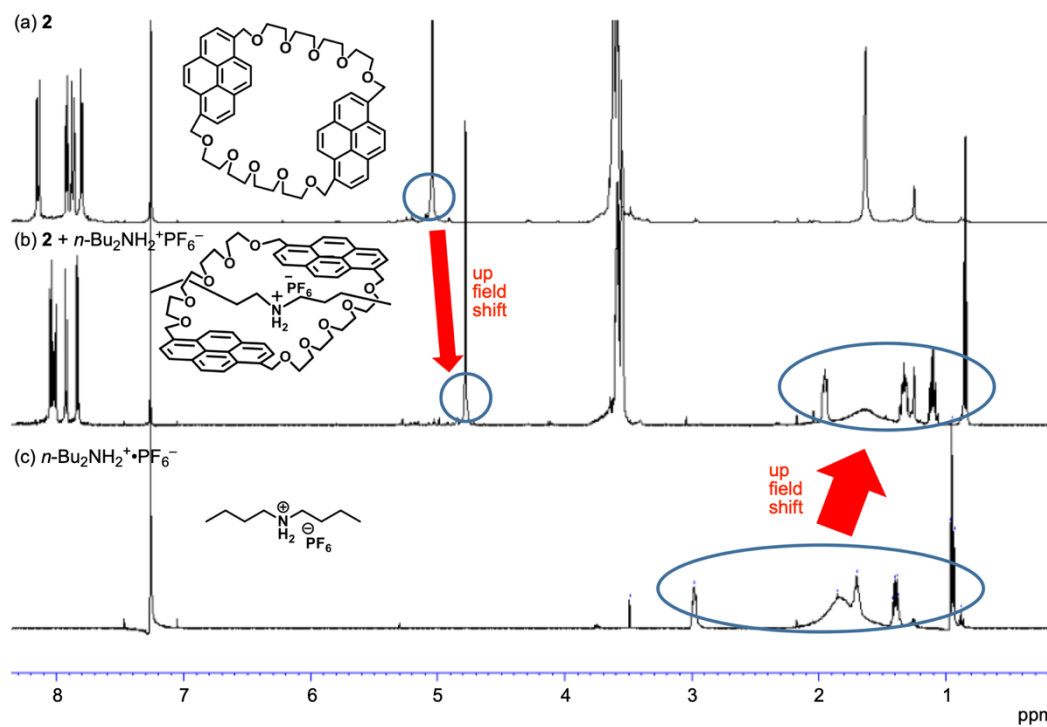

**Fig. S6** 500 MHz  $^1\text{H}$  NMR spectra of (a) **2**, (b) a mixture of **2** with  $n\text{-Bu}_2\text{NH}_2^+\text{PF}_6^-$ , and (c)  $n\text{-Bu}_2\text{NH}_2^+\text{PF}_6^-$  in  $\text{CDCl}_3$ .

E:\pirenophan(triethylene)\-3'uš\·no81-2-1.als

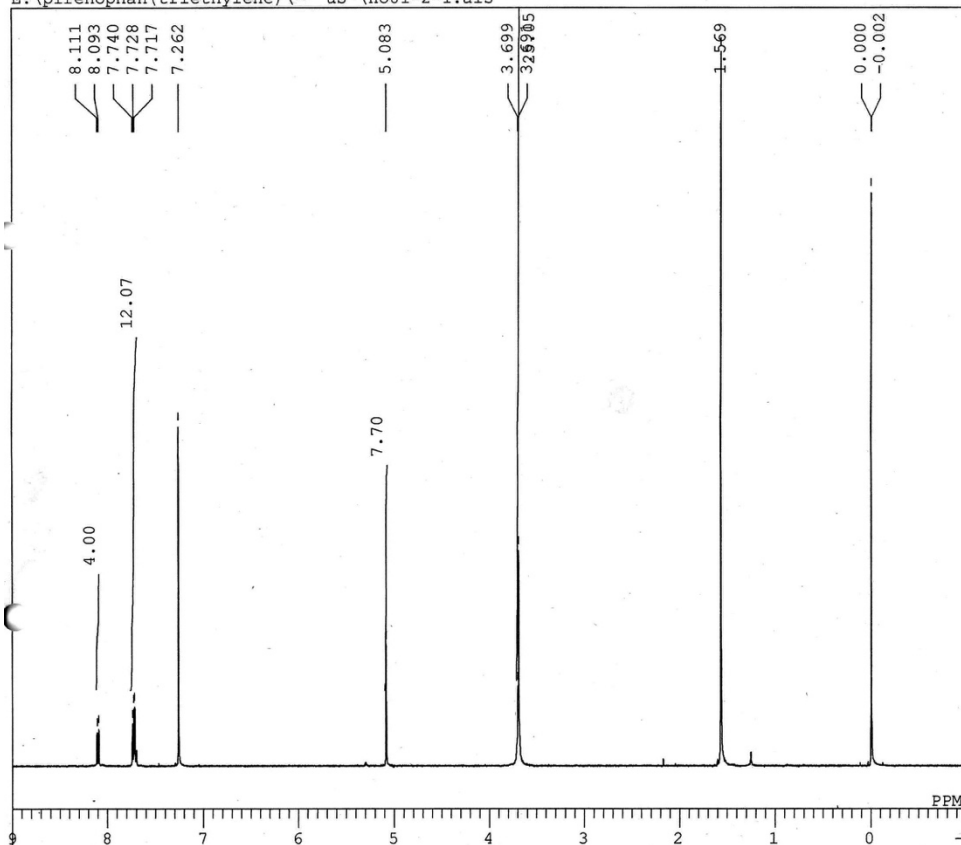

```

DFILE no81-2-1.als
COMNT
DATIM 2016-08-03 12:54:55
OBNUC 1H
EXMOD single_pulse.ex2
OBFRQ 500.16 MHz
OBSET 2.41 KHz
OBFIN 6.01 Hz
POINT 13107
FREQU 7507.39 Hz
SCANS 8
ACQTM 1.7459 sec
PD 5.0000 sec
PWL 6.60 usec
IRNUC 1H
CTEMP 21.1 c
SLVNT CDCL3
EXREF 0.00 ppm
BF 0.12 Hz
RGAIN 36
    
```

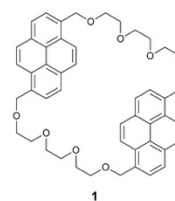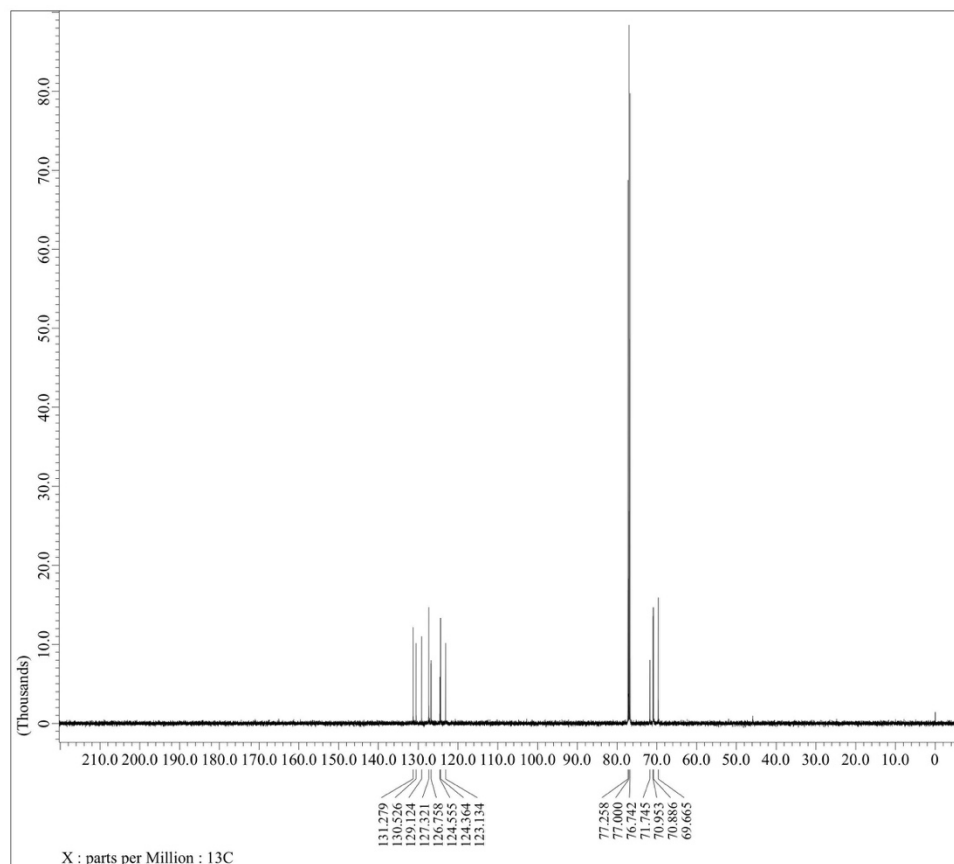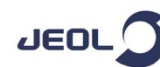

```

Filename = no53carbon-1-3.jdf
Author = 前多 謙
Experiment = single_pulse_dec
Solvent = CDCL3
Revision_Time = 6-DEC-2022 18:50:13

Data Format = 1D COMPLEX
Dim Size = 26214
X_Domain = 13C
Dim Title = 13C
Dim Units = [ppm]
Dimensions = X
Spectrometer = ALICE_NMR

X_Domain = 13C
X_Freq = 125.77787086[MHz]
X_Offset = 0[Hz]
X_Points = 26214
X_Prescans = 4
X_Sweep = 31.44606055[kHz]
SCANS = 1000

Relaxation_Delay = 2
Recvr_Gain = 54
Temp_Get = 20[dc]
    
```

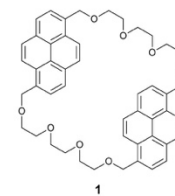

Fig. S7 500 MHz  $^1\text{H}$  and 125 MHz  $^{13}\text{C}$  NMR spectra of **1** in  $\text{CDCl}_3$ .

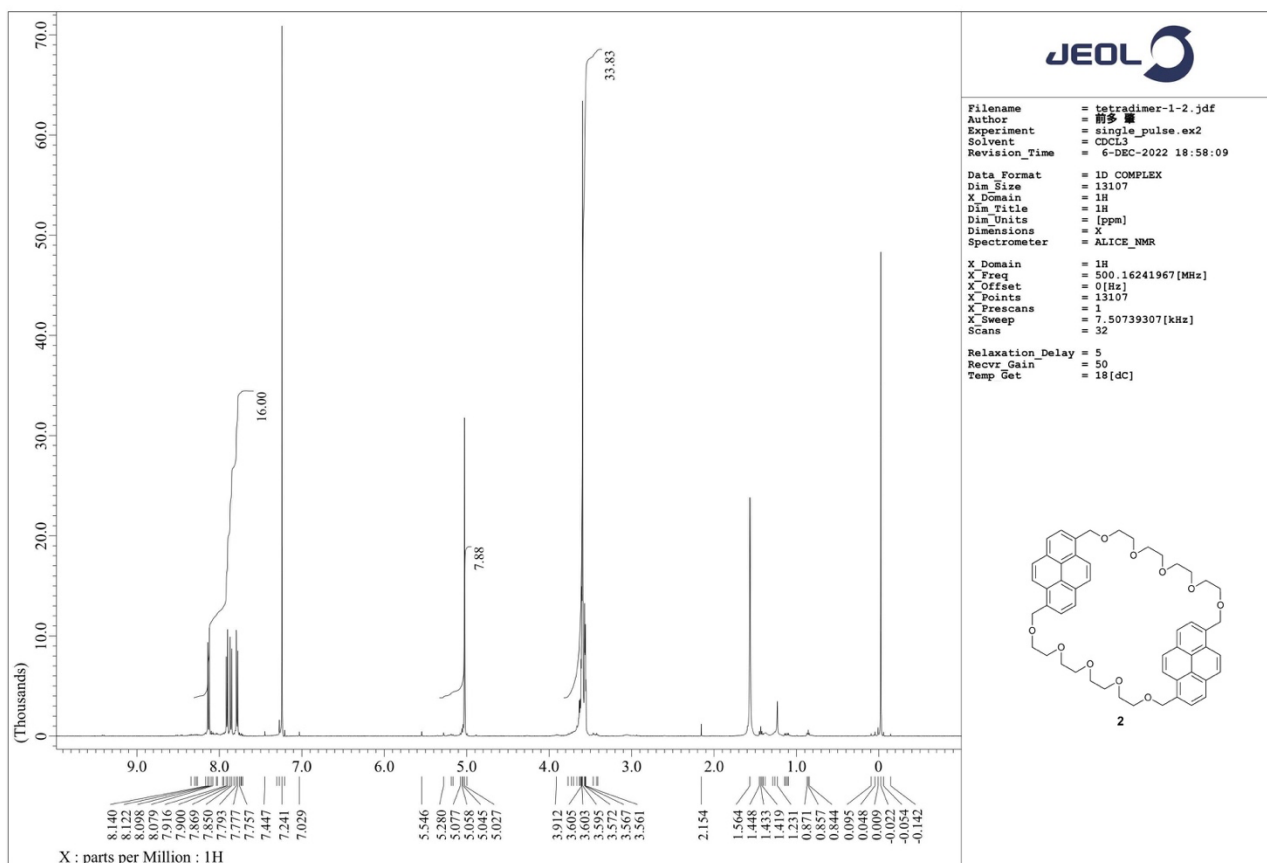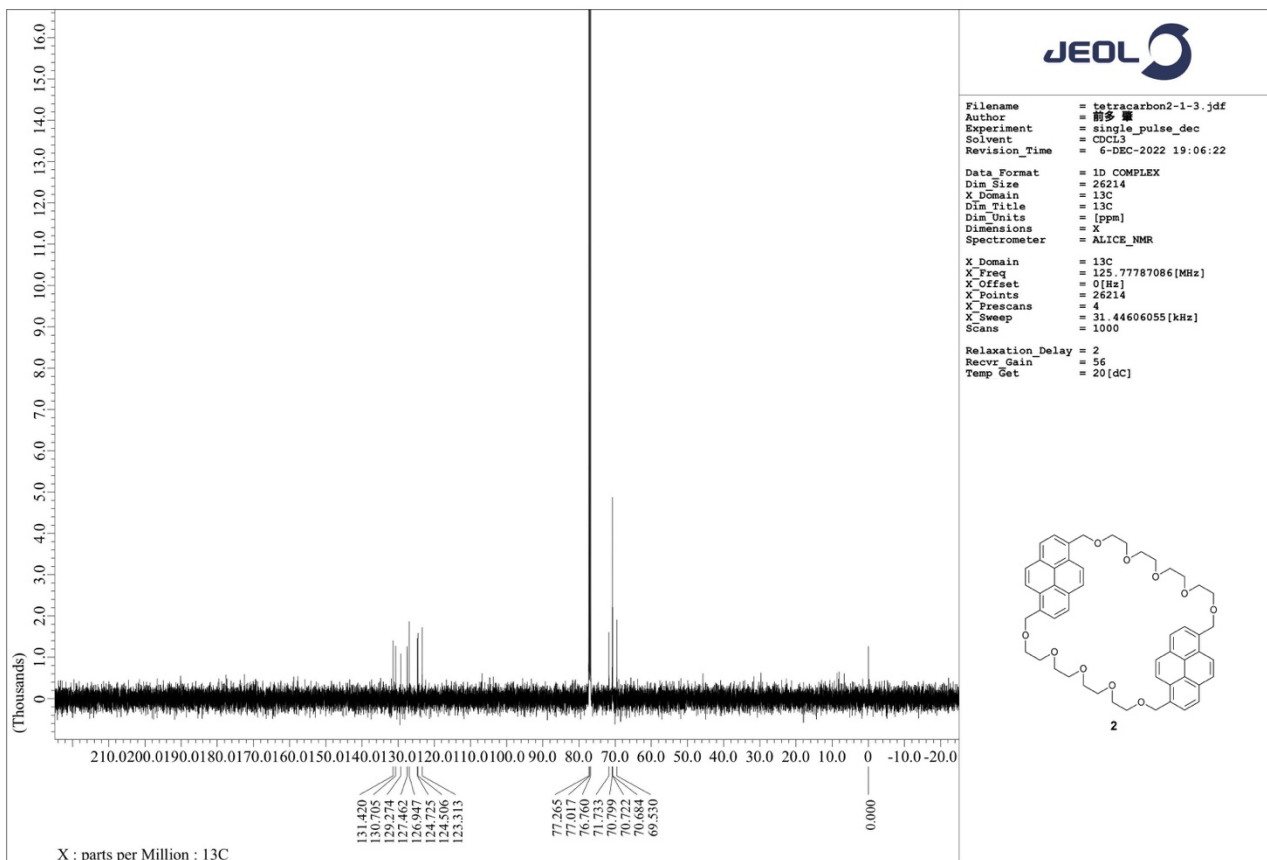

**Fig. S8** 500 MHz  $^1\text{H}$  and 125 MHz  $^{13}\text{C}$  NMR spectra of **2** in  $\text{CDCl}_3$ .





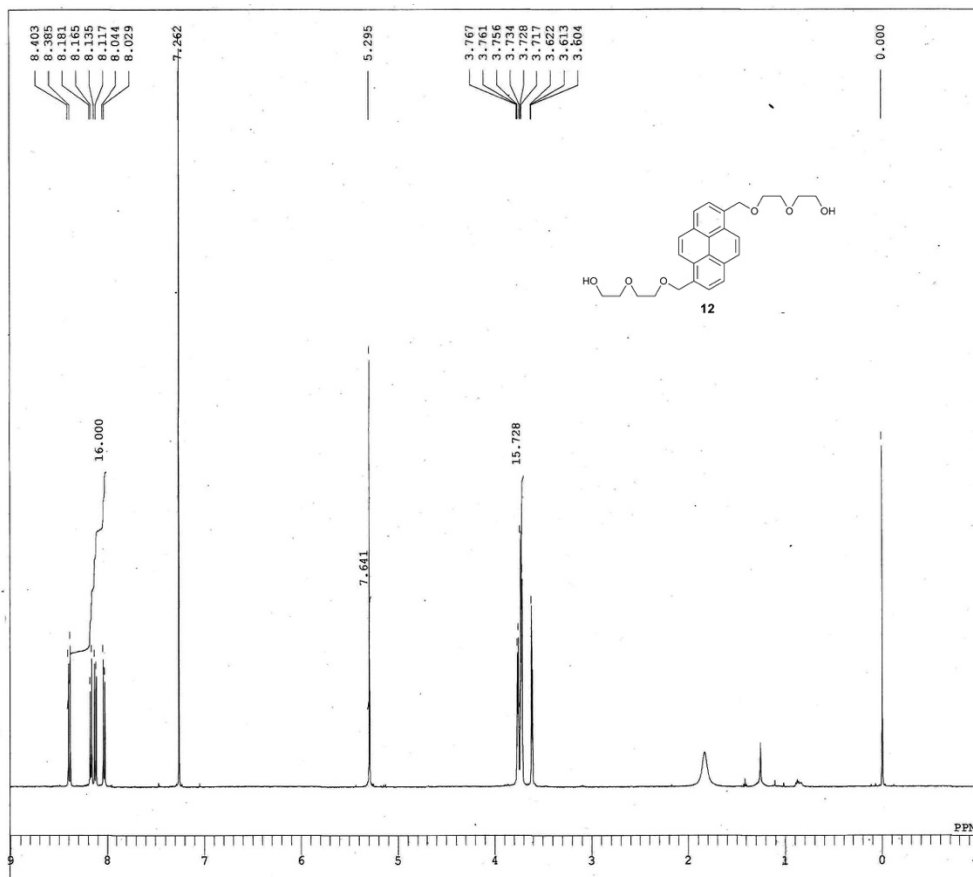

```

DFILE dimer3-1.als
COMNT
DATIM 2015-11-04 15:27:20
OBNUC 1H
EXMOD single_pulse.ex2
OBFREQ 500.16 MHz
OBSETE 2.41 KHz
OBFIN 6.01 Hz
POINT 13107
FREQU 7507.39 Hz
SCANS 24
ACQTM 1.7459 sec
PD 5.0000 sec
PWL 5.80 usec
IRNUC 1H
CTEMP 20.4 c
SIVNT CDCL3
EXREF 0.00 ppm
BF 0.12 Hz
RGAIN 56
  
```

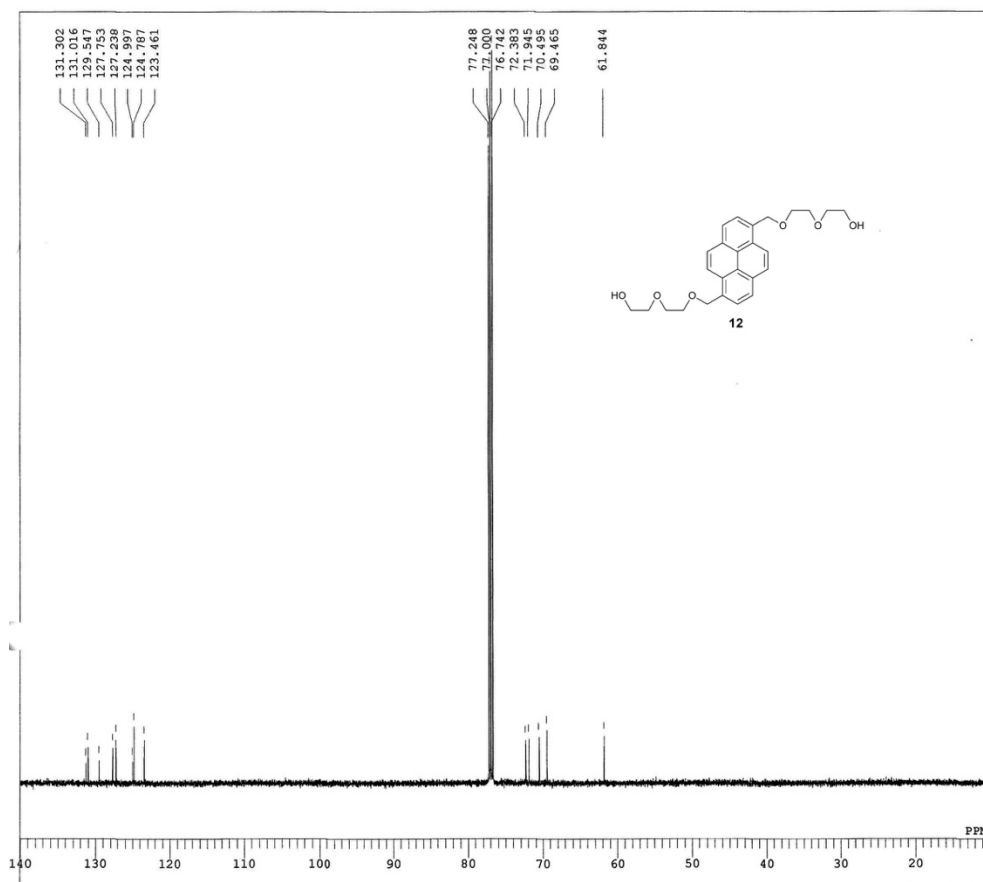

```

DFILE dimercarbon2-1.als
COMNT
DATIM 2015-10-31 12:42:46
OBNUC 13C
EXMOD single_pulse_dec
OBFREQ 125.77 MHz
OBSETE 7.87 KHz
OBFIN 4.21 Hz
POINT 32768
FREQU 39308.18 Hz
SCANS 1000
ACQTM 0.8336 sec
PD 2.0000 sec
PWL 3.00 usec
IRNUC 1H
CTEMP 19.7 c
SIVNT CDCL3
EXREF 77.00 ppm
BF 0.12 Hz
RGAIN 56
  
```

Fig. S10 500 MHz  $^1\text{H}$  and 125 MHz  $^{13}\text{C}$  NMR spectra of **12** in  $\text{CDCl}_3$ .

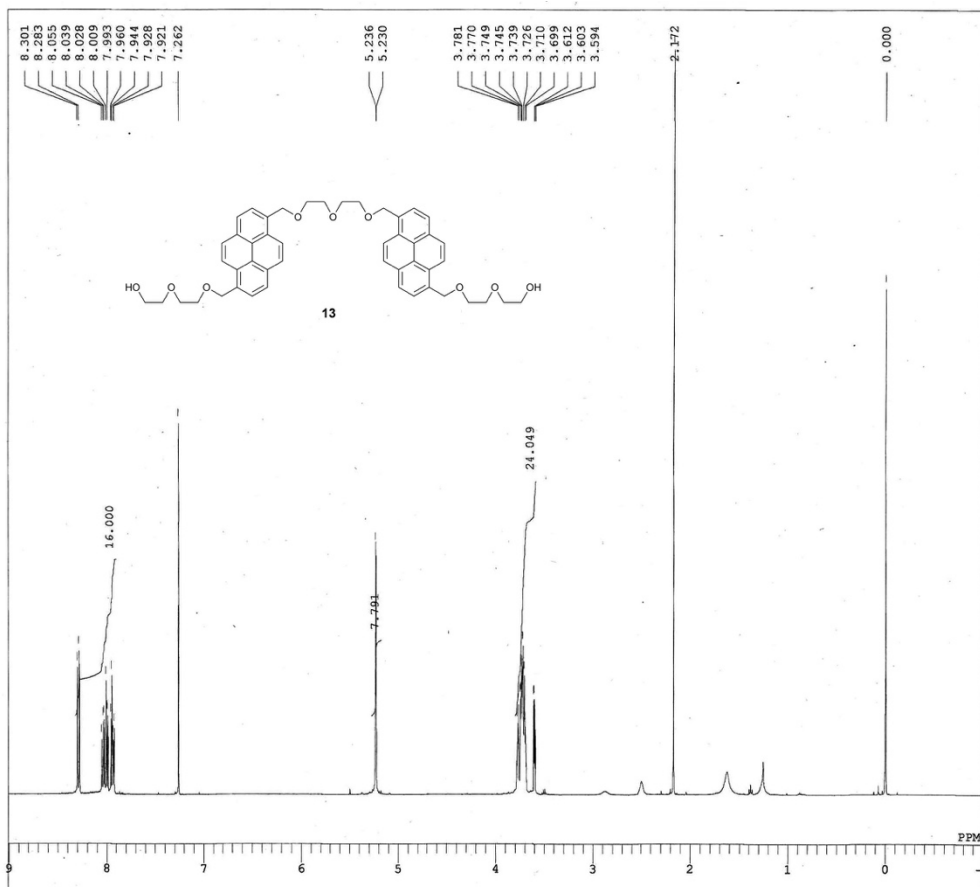

DFILE žuš40.8.jdf  
 COMNT  
 DATIM 2015-11-26 14:26:58  
 CBNUC 1H  
 EXMOD single\_pulse.ex2  
 OBFRQ 500.16 MHz  
 OBSST 2.41 KHz  
 OBFIN 6.01 Hz  
 POINT 16384  
 FREQU 9384.38 Hz  
 SCANS 8  
 ACQTM 1.7459 sec  
 PD 5.0000 sec  
 PWL 5.80 usec  
 IRNUC 1H  
 CTEMP 20.5 c  
 SLVNT CDCL3  
 EXREF 0.00 ppm  
 BF 0.20 Hz  
 RGAIN 46

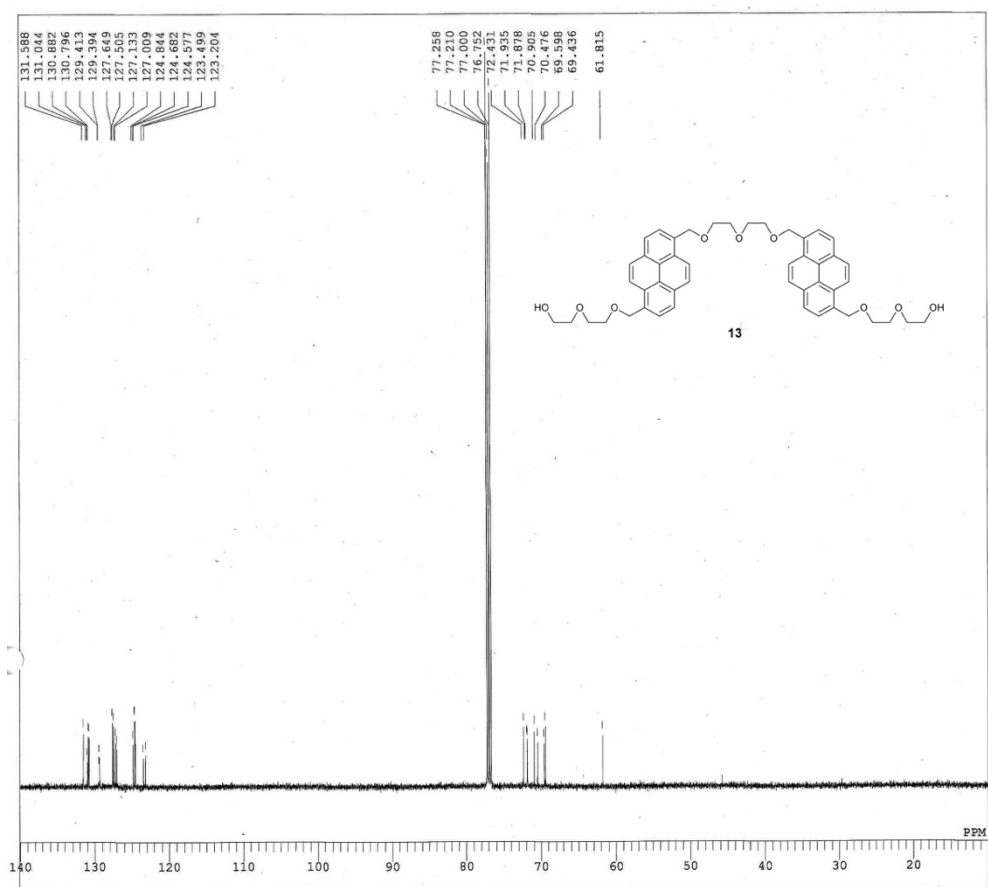

DFILE dimercarbon-1.jdf  
 COMNT  
 DATIM 2015-11-27 19:49:58  
 CBNUC 13C  
 EXMOD single\_pulse\_dec  
 OBFRQ 125.77 MHz  
 OBSST 7.87 KHz  
 OBFIN 4.21 Hz  
 POINT 32768  
 FREQU 39308.18 Hz  
 SCANS 1000  
 ACQTM 0.8336 sec  
 PD 2.0000 sec  
 PWL 3.00 usec  
 IRNUC 1H  
 CTEMP 21.0 c  
 SLVNT CDCL3  
 EXREF 77.00 ppm  
 BF 0.12 Hz  
 RGAIN 56

Fig. S11 500 MHz <sup>1</sup>H and 125 MHz <sup>13</sup>C NMR spectra of **13** in CDCl<sub>3</sub>.
